# Supplementary material for: Quality of Life and Kidney Function in Older Adults: Prospective Data of the SCOPE Study
Source: MDPI journal article supplement (doi:10.3390/jcm12123959), 2023-06-09
Supplement: s1 [file s1]

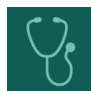

**Table S1.** Sociodemographic, clinical, physical, and emotional characteristics at baseline, and their change over a two-year follow-up period (i.e.,  $\Delta$ ) of: 1) Older adults included in the analyses and 2) Older adults excluded from the analyses.

|                                                                             | <b>Total<br/>N=2,461</b> | <b>Included<br/>N=1,748</b> | <b>Excluded<br/>N=713</b> | <b>p-value</b> |
|-----------------------------------------------------------------------------|--------------------------|-----------------------------|---------------------------|----------------|
| <b>Baseline assessment</b>                                                  |                          |                             |                           |                |
| Sex, <i>Female</i> n(%)                                                     | 1,380(56.1%)             | 969(55.4%)                  | 411(57.6%)                | 0.317          |
| <b>Age</b> , mean $\pm$ SD                                                  | 80.4 $\pm$ 4.2           | 79.9 $\pm$ 3.9              | 81.6 $\pm$ 4.7            | <0.001         |
| Educational (years), mean $\pm$ SD                                          | 11.3 $\pm$ 4.9           | 11.5 $\pm$ 4.9              | 10.7 $\pm$ 4.7            | <0.001         |
| <b>Marital status</b> , <i>Widow</i> n(%)                                   | 808(32.8%)               | 553(31.6%)                  | 255(35.8%)                | <0.001         |
| BMI, mean $\pm$ SD                                                          | 27.8 $\pm$ 4.5           | 27.7 $\pm$ 4.3              | 28.1 $\pm$ 4.9            | 0.082          |
| <b>MMSE</b> , mean $\pm$ SD                                                 | 27.9 $\pm$ 2.7           | 28.1 $\pm$ 2.5              | 27.3 $\pm$ 3.0            | <0.001         |
| <b>Diabetes</b> , n(%)                                                      | 605(24.6%)               | 398(22.8%)                  | 207(29%)                  | <0.001         |
| <b>Hypertension</b> , n(%)                                                  | 1,854(75.3%)             | 1,314(75.2%)                | 540(75.7%)                | <0.001         |
| <b>Stroke</b> , n(%)                                                        | 139(5.6%)                | 94(5.4%)                    | 45(6.3%)                  | 0.147          |
| <b>Hip fracture</b> , n(%)                                                  | 119(4.8%)                | 74(4.2%)                    | 45(6.3%)                  | 0.007          |
| COPD, n(%)                                                                  | 287(11.7%)               | 203(11.6%)                  | 84(11.8%)                 | 0.373          |
| Osteoporosis, n(%)                                                          | 752(30.6%)               | 534(30.5%)                  | 218(30.6%)                | 0.154          |
| Parkinson's disease, n(%)                                                   | 46(1.9%)                 | 26(1.5%)                    | 20(2.8%)                  | 0.011          |
| <b>Anemia</b> , n(%)                                                        | 477(19.4%)               | 296(16.9%)                  | 181(25.4%)                | <0.001         |
| LUTS, n(%)                                                                  | 677(27.5%)               | 493(28.2%)                  | 184(25.8%)                | 0.692          |
| <b>Falls History</b> , n(%)                                                 | 746(30.3%)               | 521(29.8%)                  | 225(31.6%)                | 0.009          |
| <b>CKD</b> , n(%)                                                           | 1,580(64.2%)             | 1,111(63.6%)                | 469(65.8%)                | <0.001         |
| <b>CIRS-F score</b> , mean $\pm$ SD                                         | 8.5 $\pm$ 4.6            | 8.3 $\pm$ 4.5               | 9.2 $\pm$ 4.9             | <0.001         |
| <b>5+ prescribed medications</b> , n(%)                                     | 1,624(66%)               | 1,123(64.2%)                | 501(70.3%)                | 0.004          |
| <b>GDS-SF score</b> , mean $\pm$ SD                                         | 2.7 $\pm$ 2.7            | 2.5 $\pm$ 2.6               | 3.1 $\pm$ 2.9             | <0.001         |
| <b>SPPB score</b> , mean $\pm$ SD                                           | 8.6 $\pm$ 3.0            | 9.0 $\pm$ 2.8               | 7.6 $\pm$ 3.3             | <0.001         |
| Balance test, mean $\pm$ SD                                                 | 3.2 $\pm$ 1.2            | 3.3 $\pm$ 1.1               | 2.9 $\pm$ 1.3             | <0.001         |
| Gait Speed test, mean $\pm$ SD                                              | 3.1 $\pm$ 1.1            | 3.3 $\pm$ 1.0               | 2.8 $\pm$ 1.2             | <0.001         |
| Chair Stand test, mean $\pm$ SD                                             | 2.6 $\pm$ 1.2            | 2.7 $\pm$ 1.2               | 2.4 $\pm$ 1.2             | <0.001         |
| Grip Strength test, mean $\pm$ SD                                           | 24.4 $\pm$ 9.8           | 25.1 $\pm$ 10.1             | 22.4 $\pm$ 8.9            | <0.001         |
| <b>After two-year follow-up period</b>                                      |                          |                             |                           |                |
| CKD progression, n(%)                                                       | 576(23.4%)               | 531(30.4%)                  | 45(6.3%)                  | <0.001         |
| <b><math>\Delta</math> eGFR (mL/min/1.73 m<sup>2</sup>)</b> , mean $\pm$ SD | -2.4 $\pm$ 6.9           | -2.4 $\pm$ 6.9              | -2.3 $\pm$ 5.7            | 0.717          |
| $\Delta$ GDS-SF score, mean $\pm$ SD                                        | -0.1 $\pm$ 2.5           | -0.1 $\pm$ 2.5              | -0.1 $\pm$ 2.7            | 0.910          |
| $\Delta$ SPPB score, mean $\pm$ SD                                          | -0.6 $\pm$ 2.3           | -0.6 $\pm$ 2.3              | -1.0 $\pm$ 3.2            | 0.773          |
| $\Delta$ Balance, mean $\pm$ SD                                             | -0.2 $\pm$ 1.2           | -0.1 $\pm$ 1.2              | -0.5 $\pm$ 1.4            | 0.062          |
| $\Delta$ Gait Speed, mean $\pm$ SD                                          | -0.2 $\pm$ 1.0           | -0.2 $\pm$ 1.0              | -0.3 $\pm$ 1.3            | 0.666          |
| $\Delta$ Chair Stand, mean $\pm$ SD                                         | -0.1 $\pm$ 1.1           | -0.1 $\pm$ 1.1              | 0.0 $\pm$ 1.2             | 0.536          |
| $\Delta$ Grip Strength, mean $\pm$ SD                                       | -1.1 $\pm$ 5.5           | -1.1 $\pm$ 5.5              | -1.7 $\pm$ 6.1            | 0.430          |

**Abbreviations:** EQ-VAS, Euro-Quality of life visual analogue scale; BMI, Body mass index; MMSE, Mini-mental state examination; COPD, Chronic obstructive pulmonary disease; LUTS, lower urinary tract symptoms; CKD, Chronic kidney disease; eGFR, estimated glomerular filtration rate; CIRS-G, Cumulative Illness Rating Scale for Geriatrics; GDS-SF, Geriatric depression scale - Short Form; EQ-5D, Euro-Quality of life 5 dimensions; SPPB, Short physical performance battery. *Note:* negative value of  $\Delta$  eGFR,  $\Delta$  SPPB,  $\Delta$  Balance,  $\Delta$  Gait, indicates a progression of CKD and physical performance, respectively; while a positive value of  $\Delta$  GDS-SF indicates a progression in self-reported depressive symptoms.
